# Supplementary material
Source: publisher site journal article supplement (http://mycokeys.pensoft.net/article/9646/download/suppl/33/)
Supplement: Supplementary file 2

# Comparison of clipped vs. unclipped read assignments

January 7, 2015

## Above Sediment

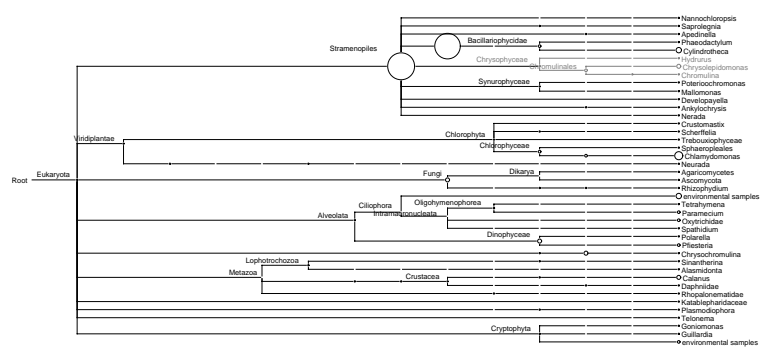

(a) clipped reads

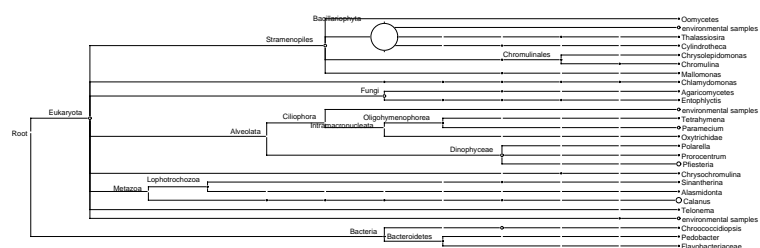

(b) unclipped reads

Figure 1: Reads from "AboveSed" sample assigned to Silva LSU sequences

## Benthos

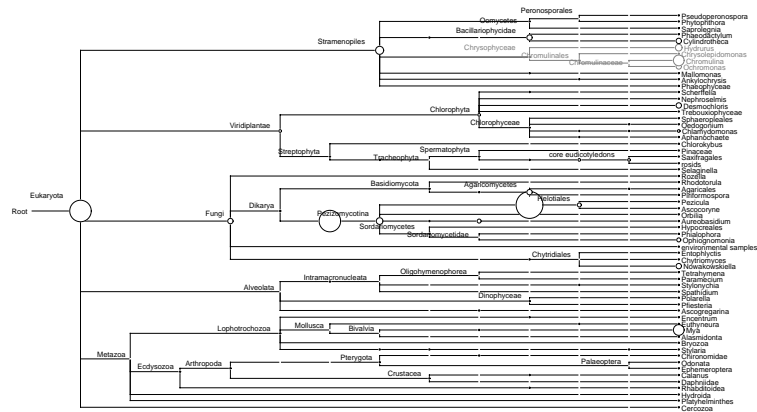

(a) clipped reads

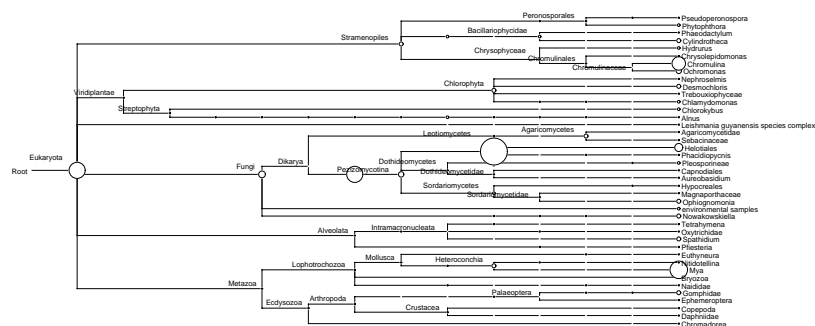

(b) unclipped reads

Figure 2: Reads from "Benthos" sample assigned to Silva LSU sequences

# Biofilm

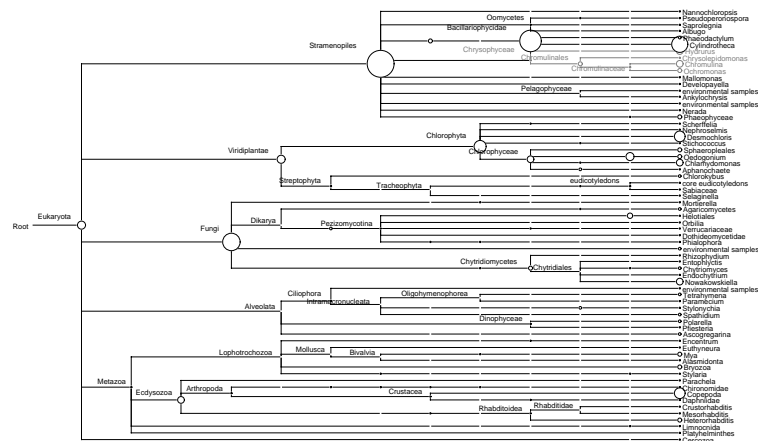

(a) clipped reads

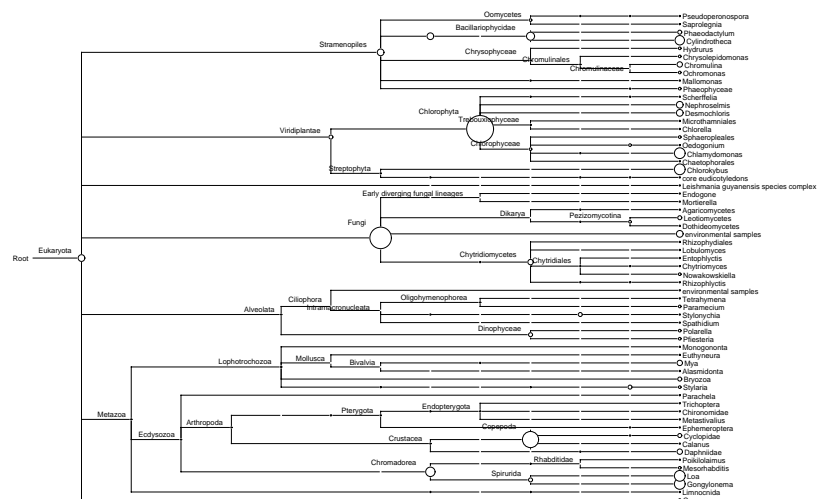

(b) unclipped reads

Figure 3: Reads from "Biofilm" sample assigned to Silva LSU sequences

# Littoral

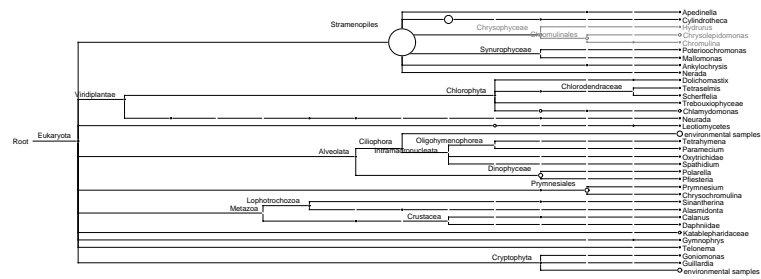

(a) clipped reads

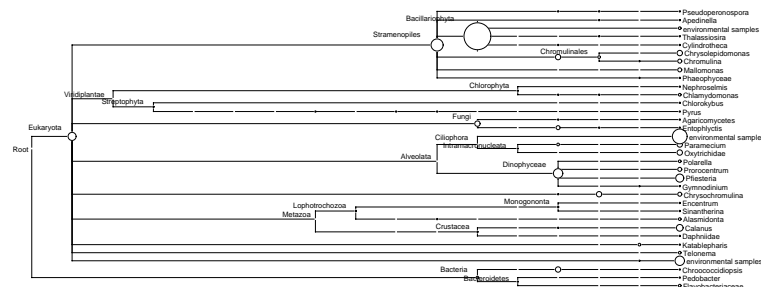

(b) unclipped reads

Figure 4: Reads from "Littoral" sample assigned to Silva LSU sequences

## Pelagial

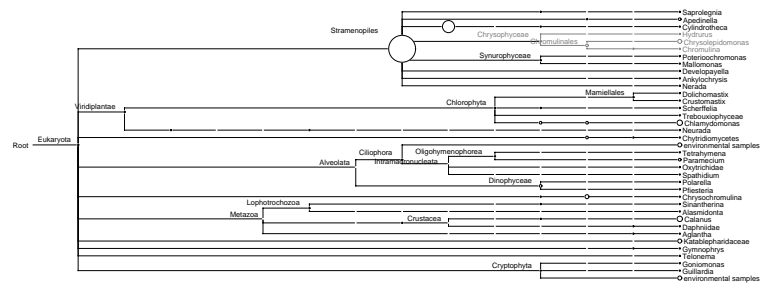

(a) clipped reads

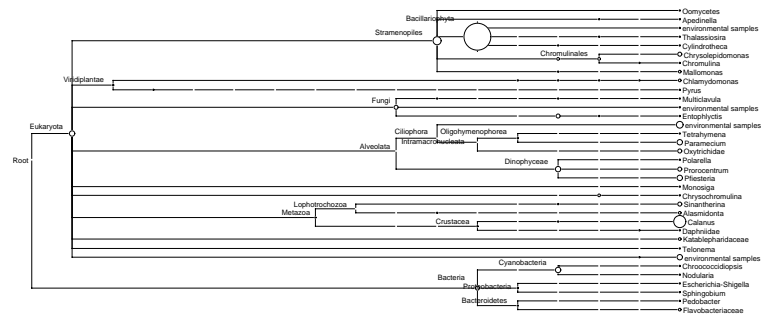

(b) unclipped reads

Figure 5: Reads from "Pelagial" sample assigned to Silva LSU sequences

# Plankton

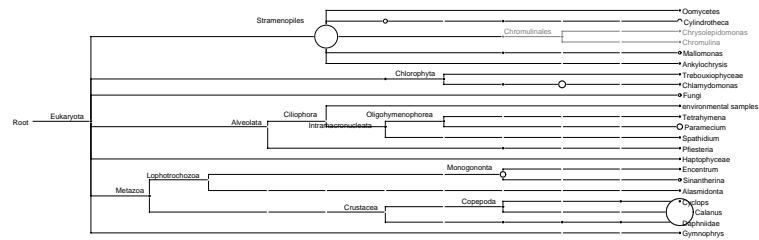

(a) clipped reads

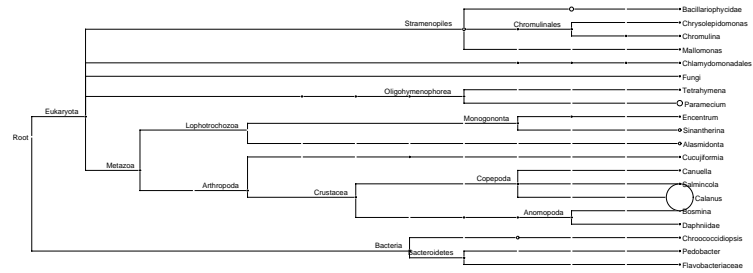

(b) unclipped reads

Figure 6: Reads from "Plankton" sample assigned to Silva LSU sequences

## Reed

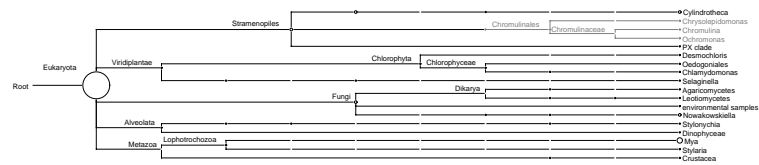

(a) clipped reads

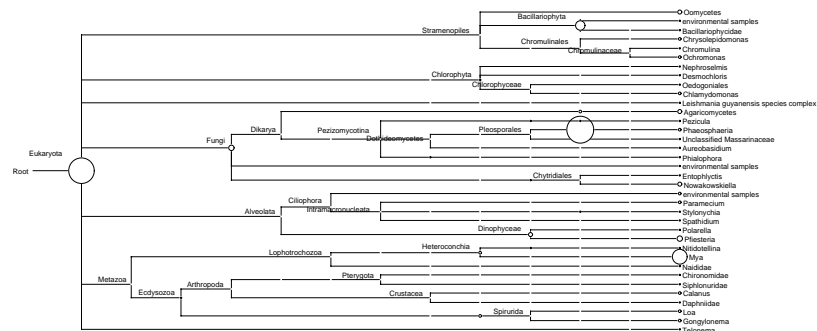

(b) unclipped reads

Figure 7: Reads from "Reed" sample assigned to Silva LSU sequences

# Sediment

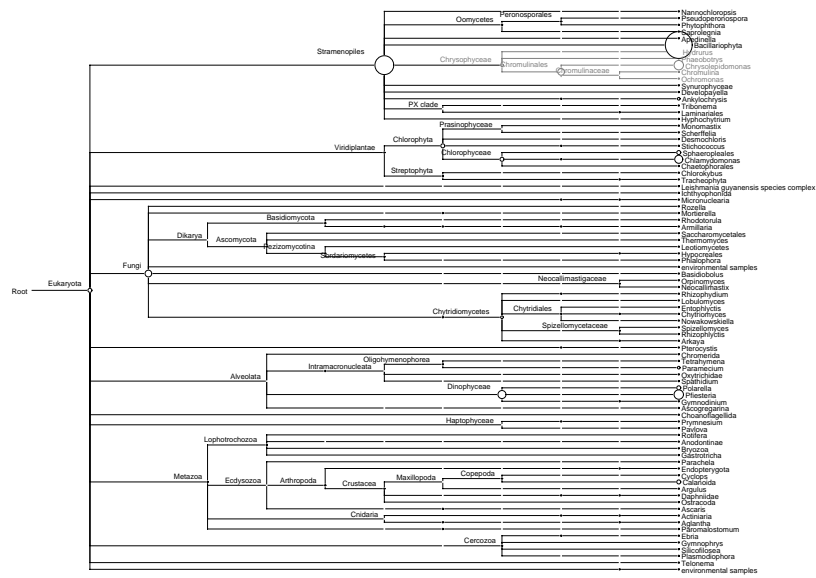

(a) clipped reads

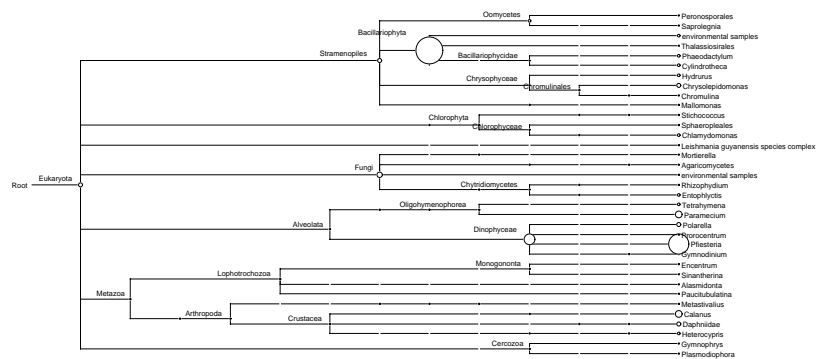

(b) unclipped reads

Figure 8: Reads from "Sediment" sample assigned to Silva LSU sequences
