# Supplementary material
Source: publisher site journal article supplement (http://mycokeys.pensoft.net/article/9646/download/suppl/33/)

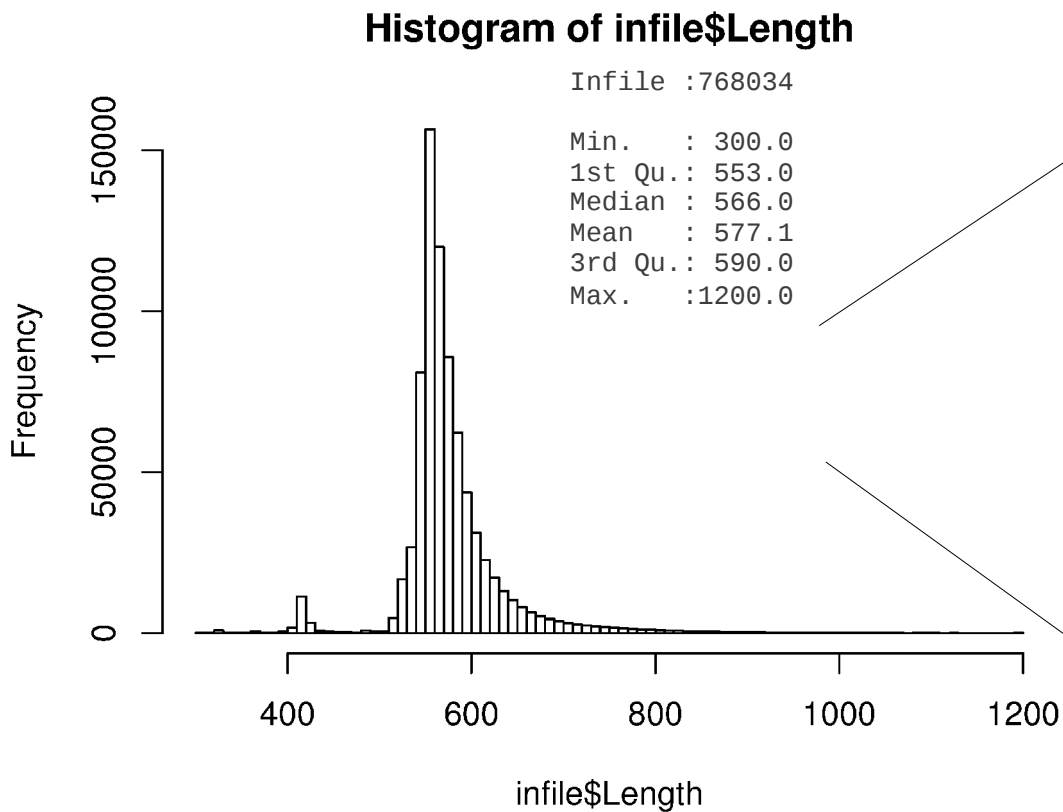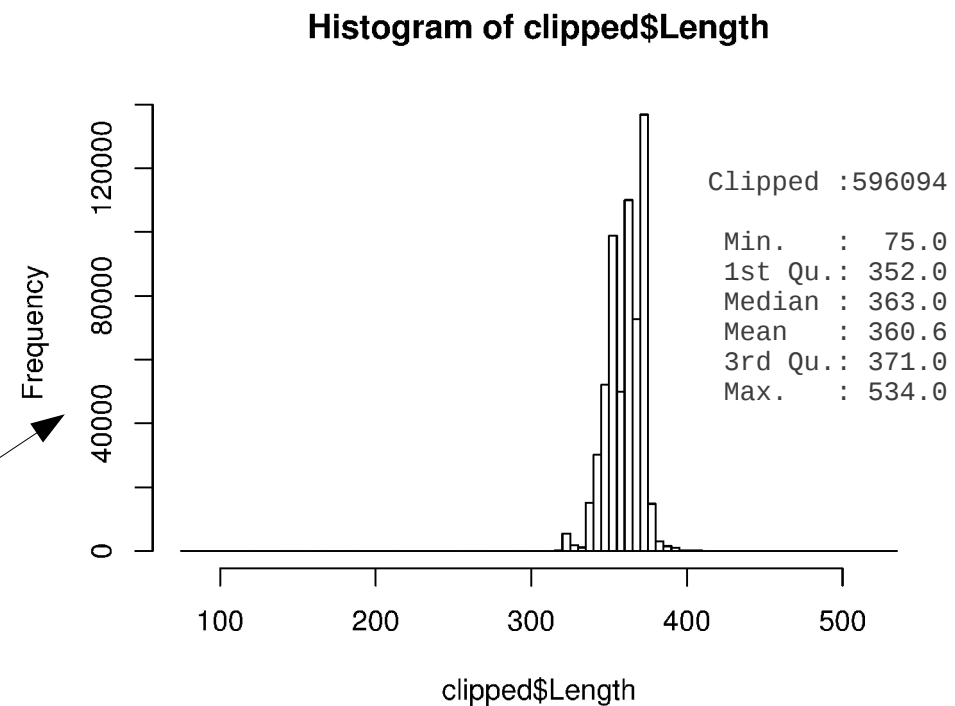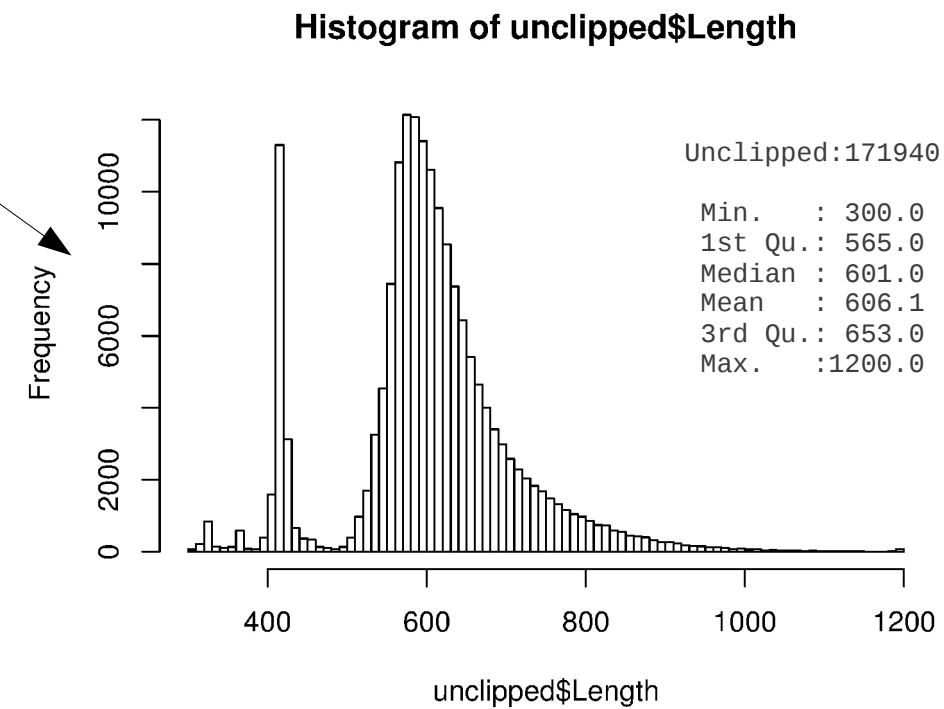

Supplement: Supplementary file 1

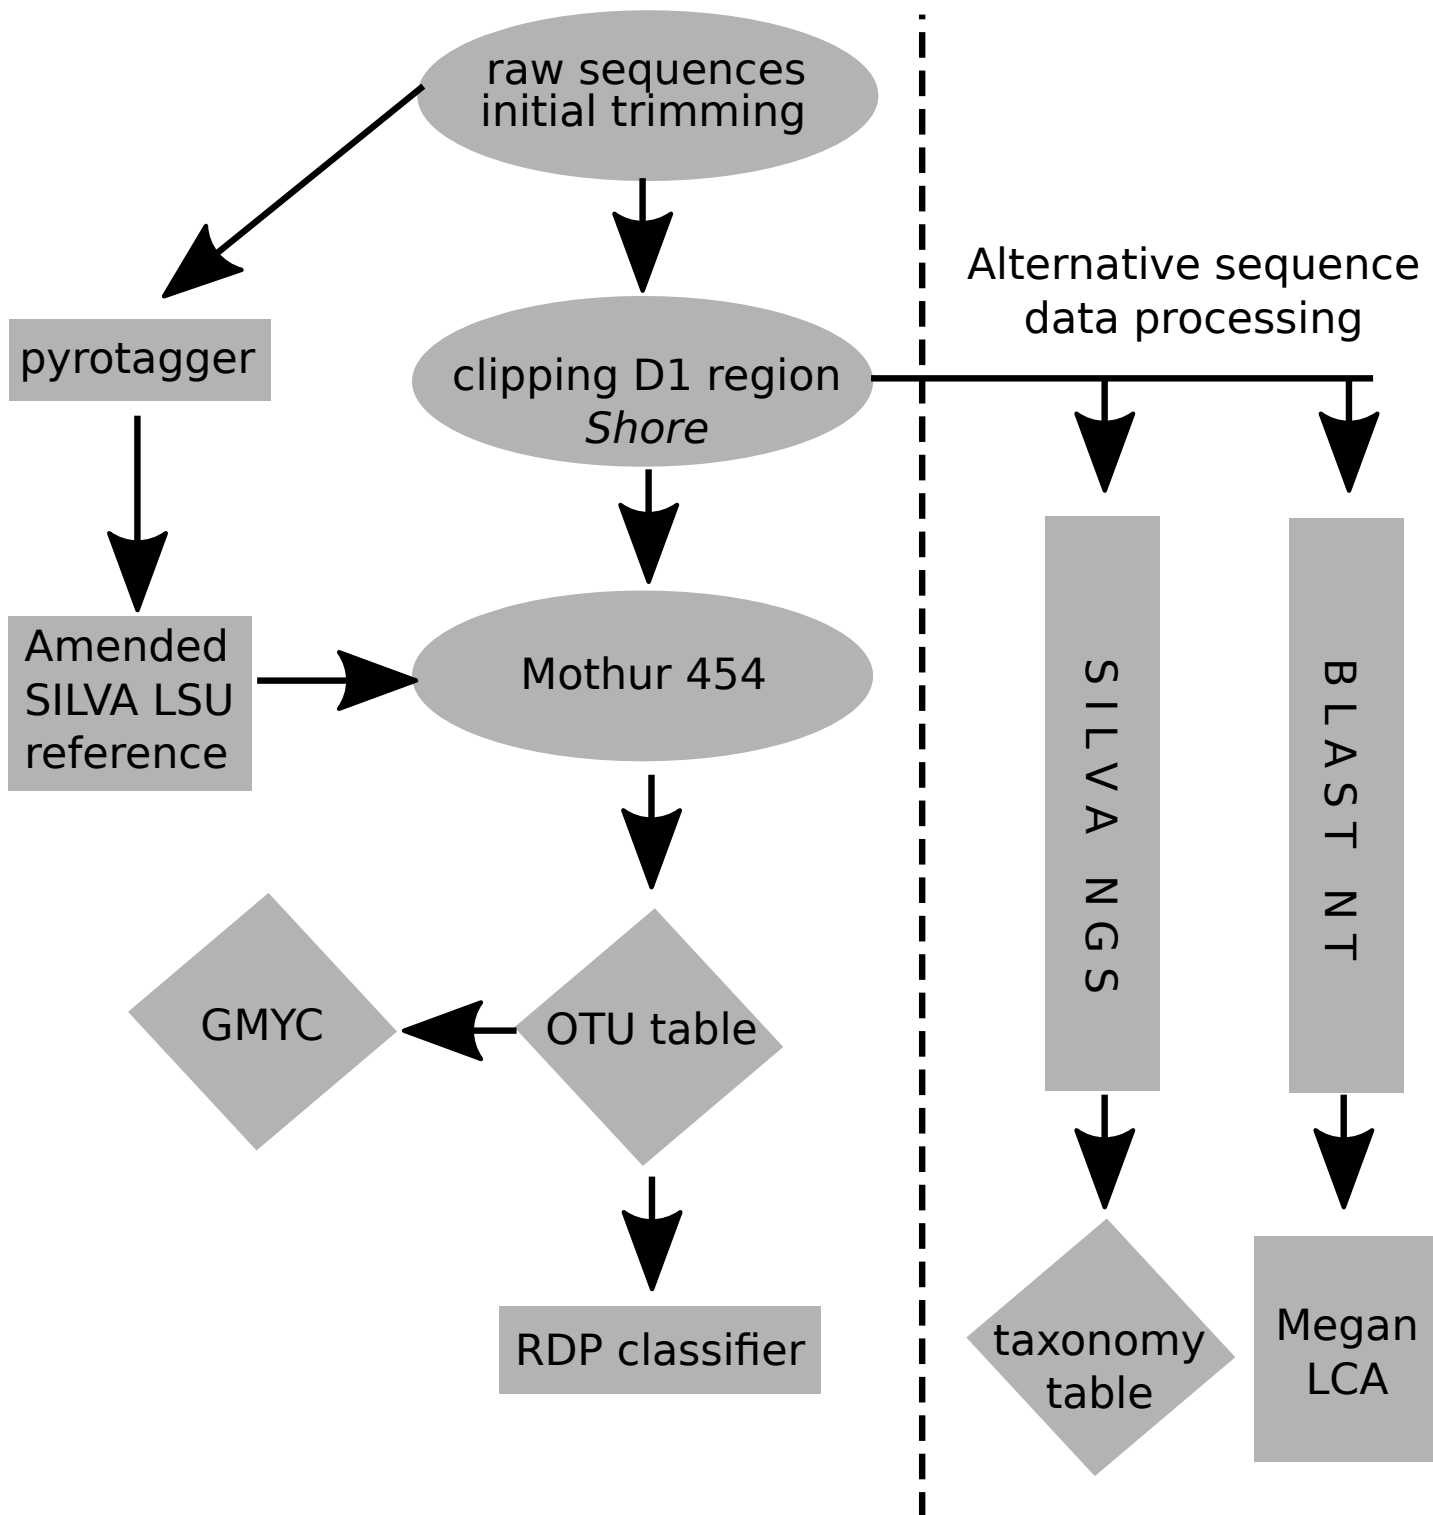

Supplement: Supplementary file 3
